# Supplementary material
Source: ML conference proceedings conference paper supplement (https://openreview.net/forum?id=f4GBN307sm)
Supplement: supplementary_material [file appendix.pdf › appendix.pdf]

## 436 A Limitation

437 Although our method theoretically guarantees optimal policy invariance under value-based shap-  
 438 ing [20], in practice, the shaping term can negatively affect training dynamics if the teacher’s value  
 439 function is severely misestimated or noisy. Although our method guarantees optimal policy invariance,  
 440 it can be reach in suboptimal. Our method assumes that the teacher value function provides reliable  
 441 signals. If the value is highly inaccurate or noisy, the shaping term may interfere with learning and  
 442 lead to suboptimal policies. We do not test cases with weak or mismatched teachers, and the method’s  
 443 robustness in such settings is unclear.

## 444 B Mathematical Derivation

### 445 B.1 Mathematical Derivation of Equation 3

446 We begin with the value-guided shaping framework introduced in our main objective:

$$\max_{\pi_{\theta}} \mathbb{E}_{\mathbf{a}_t \sim \pi_{\theta}(\cdot | \mathbf{s}_t)} \left[ \sum_{t=0}^{T-1} (r(\mathbf{s}_t, \mathbf{a}_t) + \alpha \psi_{\phi}(\mathbf{s}_t, \mathbf{a}_t)) \right], \quad (5)$$

447 where the shaping term is defined as:

$$\psi_{\phi}(s, a) := V_{\phi}(s') - V_{\phi}(s),$$

448 and  $s'$  is the next state resulting from action  $a$  in state  $s$ .

449 To connect this to the DPO setting, we follow the formulation in [25], which relates the reward  $r(s, a)$   
 450 to a soft Q-function  $Q^*(s, a)$ . In our setting, the shaped Q-function takes the form:

$$Q^*(s_t, a_t) = r(s_t, a_t) + \psi_{\phi}(s_t, a_t) + \alpha V^*(s_{t+1}), \quad (6)$$

451 assuming  $s_{t+1}$  is not terminal. At terminal states,  $V^*(s_T) = 0$ .

452 Using this, we express the total cumulative reward across a trajectory  $\tau = (s_0, a_0, \dots, a_{T-1}, s_T)$  as:

$$\begin{aligned} \sum_{t=0}^{T-1} r(s_t, a_t) &= \sum_{t=0}^{T-1} (Q^*(s_t, a_t) - V^*(s_{t+1}) - \alpha \psi_{\phi}(s_t, a_t)) \\ &= Q^*(s_0, a_0) + V^*(s_0) + \sum_{t=1}^{T-1} (Q^*(s_t, a_t) - V^*(s_t) - \alpha \psi_{\phi}(s_t, a_t)), \end{aligned}$$

453 Applying the DPO interpretation of the soft Q-function as log-probabilities [25], we approximate:  
 454  $Q^*(s_t, a_t) - V^*(s_{t+1}) = \beta \log \pi_{\theta}(a_t | s_t)$  and substitute  $\psi_{\phi}(s_t, a_t) = V_{\phi}(s_{t+1}) - V_{\phi}(s_t)$  to obtain  
 455 the shaped log-prob objective:

$$\sum_{t=0}^{T-1} r(s_t, a_t) = \sum_{t=0}^{T-1} \beta \log \frac{\pi_{\theta}(a_t | s_t)}{\exp\left(\frac{\alpha}{\beta} \psi_{\phi}(s_t, a_t)\right)} + V^*(s_0).$$

456 Thus, the TVKD loss over a pairwise preference dataset  $\mathcal{D}$  becomes:

$$\begin{aligned} \mathcal{L}_{\text{TVKD}}(\pi_{\theta}, \mathcal{D}; \pi_{\phi}) &= -\mathbb{E}_{(\tau_w, \tau_l) \sim \mathcal{D}} \left[ \log \sigma \left( \sum_{t=0}^{|\tau_w|-1} \beta \log \frac{\pi_{\theta}(a_t^w | s_t^w)}{\exp\left(\frac{\alpha}{\beta} \psi_{\phi}(s_t^w, a_t^w)\right)} \right. \right. \\ &\quad \left. \left. - \sum_{t=0}^{|\tau_l|-1} \beta \log \frac{\pi_{\theta}(a_t^l | s_t^l)}{\exp\left(\frac{\alpha}{\beta} \psi_{\phi}(s_t^l, a_t^l)\right)} \right) \right], \end{aligned}$$

457 where  $\psi_{\phi}(s, a) = V_{\phi}(s') - V_{\phi}(s)$ .

458 Note that all conditions based on the initial state  $s_0$  are shared between  $\tau_w$  and  $\tau_l$  and therefore are  
 459 canceled out in the preference-based loss.

## 460 B.2 Mathematical Derivation of the Equation 4

461 We begin by defining the *shaped reward* at each timestep  $t$  using the teacher’s potential-based shaping  
462 function  $\psi_\phi$ , which is independent of the student parameters  $\theta$ :

$$r_{\text{TVKD}}(a_t, s_t) = \beta \log \pi_\theta(a_t | s_t) - \alpha \psi_\phi(s_t, a_t).$$

463 For a pair of trajectories—one preferred ( $w$ ) and one less preferred ( $l$ )—we define the total shaped  
464 reward as:

$$R^w := \sum_{t=0}^{|\tau_w|-1} r_{\text{TVKD}}(a_t^w, s_t^w), \quad R^l := \sum_{t=0}^{|\tau_l|-1} r_{\text{TVKD}}(a_t^l, s_t^l).$$

465 Then, the preference loss is given by the negative log-sigmoid of the total reward margin:

$$\mathcal{L}_{\text{TVKD}} = -\log \sigma(R^w - R^l),$$

466 where the scalar margin is:

$$M := R^w - R^l = \sum_{t=0}^{|\tau_w|-1} r_{\text{TVKD}}(a_t^w, s_t^w) - \sum_{t=0}^{|\tau_l|-1} r_{\text{TVKD}}(a_t^l, s_t^l).$$

467 Since  $\psi_\phi$  is computed only from the teacher and does not depend on  $\theta$ , its gradient vanishes:

$$\nabla_\theta \psi_\phi(s_t, a_t) = 0.$$

468 Therefore, the gradient of the margin  $M$  becomes:

$$\nabla_\theta M = \beta \left( \sum_{t=0}^{T^w-1} \nabla_\theta \log \pi_\theta(a_t^w | s_t^w) - \sum_{t=0}^{T^l-1} \nabla_\theta \log \pi_\theta(a_t^l | s_t^l) \right).$$

469 Applying the identity  $\nabla_x \log \sigma(x) = \sigma(-x)$ , the gradient of the loss becomes:

$$\begin{aligned} \nabla_\theta \mathcal{L}_{\text{TVKD}} &= -\nabla_\theta \log \sigma(M) = \sigma(-M) \cdot \nabla_\theta M \\ &= \beta \cdot \sigma(-M) \cdot \left( \sum_{t=0}^{T^w-1} \nabla_\theta \log \pi_\theta(a_t^w | s_t^w) - \sum_{t=0}^{T^l-1} \nabla_\theta \log \pi_\theta(a_t^l | s_t^l) \right). \end{aligned}$$

470 This formulation generalizes to trajectories of unequal lengths and cleanly separates the teacher  
471 shaping from the student optimization path. The teacher’s value function contributes to the reward  
472 margin, while the gradient flows solely through the student model’s log-probabilities.

## 473 B.3 Mathematical Derivation of Equation 3 in MaxEnt RL setting

474 We extend our value-guided objective to the entropy-regularized reinforcement learning (MaxEnt  
475 RL) framework. The resulting objective is:

$$\max_{\pi_\theta} \mathbb{E}_{\mathbf{a}_t \sim \pi_\theta(\cdot | \mathbf{s}_t)} \left[ \sum_{t=0}^T (r(\mathbf{s}_t, \mathbf{a}_t) - \mathbb{D}_{\text{KL}}[\pi_\theta(\mathbf{a}_t | \mathbf{s}_t) \| \pi_{\text{ref}}(\mathbf{a}_t | \mathbf{s}_t)] + \alpha \psi_\phi(\mathbf{s}_t, \mathbf{a}_t)) \right], \quad (7)$$

476 where the shaping term is defined as  $\psi_\phi(s, a) := V_\phi(s') - V_\phi(s)$ , consistent with the formulation in  
477 our main objective.

478 We follow [25], which describes the recursive soft Q-function in token-level DPO as:

$$Q^*(s_t, a_t) = \begin{cases} r(s_t, a_t) + \beta \log \pi_{\text{ref}}(a_t | s_t) + V^*(s_{t+1}) + \alpha \psi_\phi(s_t, a_t), & \text{if } s_{t+1} \text{ is not terminal,} \\ r(s_t, a_t) + \beta \log \pi_{\text{ref}}(a_t | s_t) + V_\phi(s_t), & \text{if } s_{t+1} \text{ is terminal.} \end{cases} \quad (8)$$

479 Summing over a trajectory  $\tau = (s_0, a_0, \dots, a_{T-1}, s_T)$ , the total reward becomes:

$$\sum_{t=0}^{T-1} r(s_t, a_t) = \sum_{t=0}^{T-1} [Q^*(s_t, a_t) - \beta \log \pi_{\text{ref}}(a_t | s_t) - V^*(s_{t+1}) - \alpha \psi_\phi(s_t, a_t)] \quad (9)$$

$$= \sum_{t=0}^{T-1} [\beta \log \pi_\theta(a_t | s_t) - \beta \log \pi_{\text{ref}}(a_t | s_t) - \alpha \psi_\phi(s_t, a_t)] \quad (10)$$

$$= \sum_{t=0}^{T-1} \beta \log \frac{\pi_\theta(a_t | s_t)}{\pi_{\text{ref}}(a_t | s_t)} - \sum_{t=0}^{T-1} \alpha \psi_\phi(s_t, a_t). \quad (11)$$

480 The final TVKD loss under MaxEnt RL:

$$\begin{aligned} \mathcal{L}_{TVKD}(\pi_\theta, \mathcal{D}; \pi_{\text{ref}}, \pi_\phi) = & -\mathbb{E}_{(\tau_w, \tau_l) \sim \mathcal{D}} \left[ \log \sigma \left( \sum_{t=0}^{|\tau_w|-1} \beta \log \frac{\pi_\theta(a_t^w | s_t^w)}{\exp(\frac{\alpha}{\beta} \psi_\phi(s_t^w, a_t^w)) \pi_{\text{ref}}(a_t^w | s_t^w)} \right. \right. \\ & \left. \left. - \sum_{t=0}^{|\tau_l|-1} \beta \log \frac{\pi_\theta(a_t^l | s_t^l)}{\exp(\frac{\alpha}{\beta} \psi_\phi(s_t^l, a_t^l)) \pi_{\text{ref}}(a_t^l | s_t^l)} \right) \right] \end{aligned} \quad (12)$$

## 481 C Proof of Lemma

### 482 C.1 Proof of Lemma 1

483 We build on the interpretation introduced by Rafailov et al. [25], which characterizes DPO-trained  
484 policies as soft-optimal solutions in a deterministic token-level MDP. Specifically, they show that the  
485 token-level logits  $Q_\phi(s, a)$  of a DPO-trained model correspond to the soft Q-function of an optimal  
486 Boltzmann policy under the maximum entropy reinforcement learning (MaxEnt RL) framework.

487 **Assumption (from [25]).** Let  $\pi_\phi(a | s)$  be the DPO-trained policy defined as:

$$\pi_\phi(a | s) = \frac{\exp(Q_\phi(s, a)/\beta)}{\sum_{a'} \exp(Q_\phi(s, a')/\beta)},$$

488 for a fixed temperature  $\beta > 0$ . Then  $\pi_\phi$  is a soft-optimal policy with Q-function  $Q_\phi(s, a)$ , and its  
489 corresponding soft value function is defined by:

$$V_\phi(s) := \mathbb{E}_{a \sim \pi_\phi(\cdot | s)} [Q_\phi(s, a)] + \beta \mathcal{H}[\pi_\phi(\cdot | s)],$$

490 where  $\mathcal{H}[\pi] = -\sum_a \pi(a) \log \pi(a)$  denotes the entropy of the policy.

491 We now derive a closed-form expression for  $V_\phi(s)$  based on the Boltzmann structure of  $\pi_\phi$ .

492 **Derivation.** First, recall the identity:

$$\log \pi_\phi(a | s) = \frac{Q_\phi(s, a)}{\beta} - \log \sum_{a'} \exp(Q_\phi(s, a')/\beta).$$

493 Thus, the entropy term becomes:

$$\begin{aligned} \mathcal{H}[\pi_\phi] &= -\sum_a \pi_\phi(a | s) \log \pi_\phi(a | s) \\ &= -\sum_a \pi_\phi(a | s) \left( \frac{Q_\phi(s, a)}{\beta} - \log \sum_{a'} \exp(Q_\phi(s, a')/\beta) \right) \\ &= -\frac{1}{\beta} \sum_a \pi_\phi(a | s) Q_\phi(s, a) + \log \sum_{a'} \exp(Q_\phi(s, a')/\beta). \end{aligned}$$

494 Now substitute back into the soft value function definition:

$$\begin{aligned}
V_\phi(s) &= \sum_a \pi_\phi(a | s) Q_\phi(s, a) + \beta \mathcal{H}[\pi_\phi] \\
&= \sum_a \pi_\phi(a | s) Q_\phi(s, a) + \beta \left( -\frac{1}{\beta} \sum_a \pi_\phi(a | s) Q_\phi(s, a) + \log \sum_{a'} \exp(Q_\phi(s, a')/\beta) \right) \\
&= \log \sum_{a \in \mathcal{V}} \exp(Q_\phi(s, a)/\beta).
\end{aligned}$$

495 This completes the proof.

## 496 C.2 Proof of Lemma 2

497 In Section 3 we stated that augmenting the DPO reward with the Teacher Temporal Difference term  
498  $V_\phi(s_{t+1}) - V_\phi(s_t)$  does not change the optimal policy. Below we provide a formal proof.

499 *Proof.* Consider a trajectory  $\tau = (s_0, a_0, s_1, a_1, \dots, s_{T-1}, a_{T-1}, s_T)$ . Let the original return be:

$$G(\tau) = \sum_{t=0}^{T-1} r(s_t, a_t).$$

500 Now, define a potential-based shaped reward:

$$\tilde{r}(s_t, a_t, s_{t+1}) = r(s_t, a_t) + \Phi(s_{t+1}) - \Phi(s_t),$$

501 and let the corresponding shaped return be:

$$\tilde{G}(\tau) = \sum_{t=0}^{T-1} [r(s_t, a_t) + \Phi(s_{t+1}) - \Phi(s_t)].$$

502 By telescoping,

$$\sum_{t=0}^{T-1} (\Phi(s_{t+1}) - \Phi(s_t)) = \Phi(s_T) - \Phi(s_0),$$

503 so the shaped return becomes:

$$\tilde{G}(\tau) = G(\tau) + \Phi(s_T) - \Phi(s_0).$$

504 This additive term depends only on the start and end states, not on the specific actions taken. Therefore,  
505 for any policy  $\pi$ , the expected shaped state-action value is:

$$\tilde{Q}^\pi(s, a) = Q^\pi(s, a) + \mathbb{E}_{s' \sim P(\cdot | s, a)} [\Phi(s')] - \Phi(s).$$

506 Since the difference between shaped Q-values at any state  $s$  only depends on  $\Phi(s)$  and the expected  
507  $\Phi(s')$ , the ranking over actions remains unchanged:

$$\arg \max_a \tilde{Q}^*(s, a) = \arg \max_a Q^*(s, a).$$

508 Hence, the optimal policy is invariant under this form of reward shaping.  $\square$

## 509 C.3 Proof of Corollary 2.1

510 In Section 3 we claimed that action-based shaping terms such as  $\psi(s, a) = \alpha \log \pi_\phi(a | s)$  or  
511  $\psi(s, a) = \alpha Q_\phi(s, a)$  violate the conditions required for potential-based shaping and may alter the  
512 optimal policy. We now provide a formal justification.

513 *Proof.* Suppose we augment the DPO reward with an action-dependent shaping term:

$$\tilde{r}(s_t, a_t) = r(s_t, a_t) + \psi(s_t, a_t), \quad \text{where} \quad \psi(s_t, a_t) \neq \Phi(s_t) - \Phi(s_{t+1}).$$

514 Then the shaped return for a trajectory  $\tau = (s_0, a_0, s_1, \dots, s_T)$  becomes:

$$\tilde{G}(\tau) = \sum_{t=0}^T [r(s_t, a_t) + \psi(s_t, a_t)].$$

515 Unlike the state-based shaping case in Lemma 2, there is no telescoping cancellation of the added  
 516 shaping terms because  $\psi(s_t, a_t)$  depends explicitly on the action at each step and not solely on the  
 517 state. As a result, the shaped return  $\tilde{G}(\tau)$  differs from the original return  $G(\tau)$  by an amount that  
 518 depends on the entire sequence of actions:

$$\tilde{G}(\tau) = G(\tau) + \sum_{t=0}^T \psi(s_t, a_t),$$

519 where  $\sum_t \psi(s_t, a_t)$  varies with the policy and trajectory.

520 This action-dependent distortion implies that:

$$\tilde{Q}^\pi(s, a) = Q^\pi(s, a) + \mathbb{E}_{\tau \sim \pi | (s_0=s, a_0=a)} \left[ \sum_{t=0}^T \psi(s_t, a_t) \right],$$

521 which can shift the relative ranking of actions at state  $s$ , thereby changing  $\arg \max_a \tilde{Q}^*(s, a)$ .

522 Hence, the optimal policy under  $\tilde{r}$  may differ from the one under the original reward  $r$ , violating  
 523 policy invariance.  $\square$

## 524 D Relation to Advantage Function in RL

525 Our method can be interpreted as a special form of value-based reward shaping, closely related to the  
 526 advantage function in reinforcement learning. In standard RL, the advantage function is defined as:

$$A(s, a) = r(s, a) + V(s') - V(s),$$

527 which quantifies the relative benefit of taking action  $a$  at state  $s$  compared to the expected return from  
 528 the state baseline  $V(s)$ .

529 In our formulation, we do not use an explicit reward  $r(s, a)$ , as it is typically unavailable in offline  
 530 preference datasets. Instead, we define the reward shaping term using the teacher’s value function:

$$\psi(s, a) := V_\phi(s') - V_\phi(s),$$

531 where  $V_\phi$  is the value function learned by the DPO teacher model, and  $s'$  denotes the next state (i.e.,  
 532 the updated token-level context after applying action  $a$ ).

533 This formulation implicitly captures a notion of advantage by measuring the change in future utility  
 534 as estimated by the teacher. It provides directional feedback for the student model without relying on  
 535 noisy or hard-to-estimate token-level rewards.

536 This connection offers a theoretical justification for the stability and effectiveness of our method,  
 537 as value-based shaping of this form is known to preserve the optimal policy under standard condi-  
 538 tions [20].

## 539 E Experiment Details

### 540 E.1 Training Details

541 **Training Details** The SFT for both student and teacher models is conducted over 3 epochs, using  
 542 a learning rate of  $2 \times 10^{-5}$  and a batch size of 128. The DPO teacher is trained with  $\beta = 0.05$ ,  
 543 a learning rate of  $5 \times 10^{-7}$ , a batch size of 128, and for 2 epochs. For distillation methods,  
 544 we employ context distillation [3] to improve efficiency. Specifically, we precompute the top 50  
 545 probabilities and save them to use for distillation following [9]. In TVKD, we experiment with  
 546  $\alpha \in [0.1, 0.2, 0.5, 0.7, 1.0, 1.5]$  and  $\beta \in [0.1, 0.2, 0.5, 1, 2, 5]$ .

Table 6: Overall performance of Open LLM Leaderboard trained with DPOMIX datasets.

| Method             | Average       | ARC-easy      | GSM8K         | Hellaswag     | MMLU          | TruthfulQA    | Winogrande    |
|--------------------|---------------|---------------|---------------|---------------|---------------|---------------|---------------|
| DPO teacher        | 53.448        | 76.800        | 47.900        | 61.480        | 60.230        | 04.200        | 70.080        |
| SFT teacher        | 53.152        | 76.200        | 47.300        | 60.844        | 60.070        | 04.500        | 70.000        |
| SFT                | 40.176        | 59.040        | 05.500        | 49.570        | 37.950        | 29.488        | 59.510        |
| DPO                | 35.475        | 59.000        | 06.300        | 49.760        | 37.840        | 00.600        | 59.350        |
| SimPO              | 41.497        | 64.942        | 06.975        | <b>50.129</b> | 37.943        | 29.009        | 59.984        |
| WPO                | 41.356        | 64.850        | 06.369        | 49.642        | 37.958        | 29.253        | 60.063        |
| TDPO               | 40.950        | 64.310        | 06.431        | 49.991        | 37.560        | 27.907        | 59.747        |
| VanillaKD          | 41.166        | 64.980        | 05.838        | 49.353        | 37.922        | 28.764        | 60.141        |
| SeqKD              | 41.166        | 64.980        | 06.141        | 48.840        | <b>37.820</b> | 29.002        | 60.210        |
| DDPO               | 41.225        | 65.000        | 06.141        | 49.492        | 37.840        | 29.131        | 59.747        |
| DPKD               | 41.354        | 64.890        | 06.388        | 49.542        | 37.986        | 29.253        | 60.063        |
| GKD                | 41.191        | 64.770        | 06.670        | 49.070        | 37.900        | 28.274        | 60.460        |
| DCKD               | 41.328        | <b>65.110</b> | 05.990        | 49.340        | 37.850        | 29.540        | 60.140        |
| ADPA               | 40.288        | 60.185        | <b>06.670</b> | 48.626        | 37.450        | 28.760        | 60.039        |
| <b>TVKD (Ours)</b> | <b>41.605</b> | 64.550        | 05.760        | 49.650        | <b>38.540</b> | <b>29.880</b> | <b>61.250</b> |

**Detailed baseline setting** For ADPA, following the original implementation [9], we first generated a single student rollout over the entire dataset. We then computed and saved the differences between the DPO teacher and the SFT teacher, which were used during training. For other online-based KD method(SeqKD,GKD), we use only single student or teacher rollout over the entire datasets following [9]. For online-based preference distillation method, we use ground-truth chosen and rejected answer instead of teacher and student rollouts following [9]. It can be different original implementation in theoretically. In the case of our method, we saved the DPO teacher’s logits over the original dataset once and used them for training.

**Computational Efficiency** We conducted our experiments using four Nvidia RTX 4090 GPUs. The total wall time for TVKD was approximately 2.5 to 3 hours. In our method, we precompute and store the DPO teacher’s logits over the entire dataset once, which reduces computational overhead during training at the cost of increased storage usage. In contrast, methods such as GKD, SeqKD, and ADPA require generating additional student or teacher rollouts across the entire dataset and subsequently computing and storing teacher logits for each of those rollouts. This results in a larger storage overhead and slightly higher computational cost compared to our approach. In particular, ADPA requires not only the DPO-trained teacher but also the SFT-trained model to compute the logit differences, further increasing computational resource demands.

## F Additional Results

### F.1 Open LLM Leaderboard

We show the overall score of the OLLs in the main table as shown below in Table 6, Table 7.

### F.2 MT-bench

We represent the hexagons in Figure 3 that represent the performance of each task on MT-bench. Our method shows consistently high performance compared to other methods, except for coding.

### F.3 Robustness to Distillation Strength

In Figure 4a, we conduct an ablation study on the hyperparameter  $\alpha$ , which controls the influence of the teacher’s value signal during training. We observe that TVKD achieves optimal performance on both the RM score and MT-bench when  $\alpha = 0.7$ , with performance dropping at both lower and higher values. This indicates that our method offers a tunable mechanism to balance teacher guidance and data-driven learning. A small  $\alpha$  may underutilize the teacher’s future preference signal, while an excessively large  $\alpha$  can suppress the student’s capacity to fit dataset-specific patterns. The ability

Table 7: Overall performance of Open LLM Leaderboard trained with Helpsteer2 datasets.

| Method             | Average       | ARC-easy      | GSM8K         | Hellaswag     | MMLU          | TruthfulQA    | Winogrande    |
|--------------------|---------------|---------------|---------------|---------------|---------------|---------------|---------------|
| DPO teacher        | 57.949        | 78.746        | 46.745        | 61.085        | 60.109        | 30.290        | 70.718        |
| SFT teacher        | 53.152        | 76.200        | 47.300        | 60.844        | 60.070        | 04.500        | 70.000        |
| SFT                | 41.064        | 64.983        | 06.369        | 48.676        | 37.787        | 29.376        | 59.195        |
| DPO                | 41.243        | 64.680        | 05.980        | <b>49.572</b> | 37.972        | 29.253        | 60.000        |
| SimPO              | 41.308        | 64.680        | 06.141        | 48.974        | 37.958        | 30.110        | 59.984        |
| WPO                | 41.190        | 64.915        | 06.141        | 48.645        | 38.043        | 28.860        | 60.537        |
| TDPO               | 41.130        | 64.140        | 07.126        | 49.114        | 36.767        | 28.886        | 60.805        |
| VanillaKD          | 41.089        | 65.194        | 06.065        | 48.645        | 37.081        | 29.009        | 60.537        |
| SeqKD              | 41.169        | 65.194        | 05.838        | 48.964        | <b>38.200</b> | 29.009        | 59.809        |
| DDPO               | 41.234        | 65.109        | 06.293        | 49.522        | 37.958        | 29.009        | 59.511        |
| DPKD               | 41.136        | 64.948        | <b>06.358</b> | 49.422        | 37.892        | 28.764        | 59.433        |
| GKD                | 40.924        | 65.025        | 05.075        | 49.104        | 37.858        | 29.131        | 59.353        |
| DCKD               | 41.092        | 65.125        | 06.520        | 48.516        | 37.253        | 28.519        | <b>60.616</b> |
| ADPA               | 41.259        | <b>65.446</b> | 05.898        | 49.104        | 38.007        | 28.641        | 60.458        |
| <b>TVKD (Ours)</b> | <b>41.352</b> | 64.229        | 05.681        | 48.974        | 38.157        | <b>30.772</b> | 60.300        |

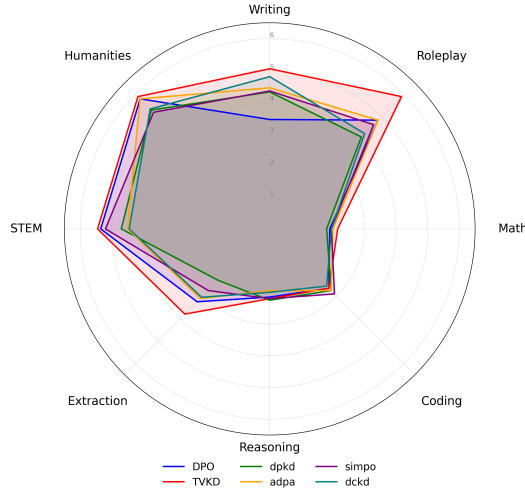

Figure 3: Visualization of token-wise preference

to adjust  $\alpha$  provides practical flexibility, enabling users to calibrate the distillation strength to suit various datasets, teacher qualities, or deployment constraints.

#### F.4 Robustness to Temperature Parameter

We present the robustness evaluation with respect to the temperature parameter  $\beta$  in Figure 4b. Our method achieves the highest performance at  $\beta = 2$ , while overall demonstrating robust behavior across a wide range of values. This suggests that although higher temperatures yield a sharper value function and thus increase discriminability, the influence of  $\beta$  remains limited since our method captures not the absolute value itself, but the difference in value before and after the current action.

#### F.5 Teacher Model Analysis

We show additional experiments in Table 8 and Table 9 to demonstrate that TPKD is robust distillation to teacher quality. We compare the distillation performance on three different teachers: the default teacher model SFTed on Deita-10k-V0, a teacher model trained with Helpsteer2 as a DPO, and Instruct teacher, the instruct tuning version posted on Huggingface. Our method outperforms DCKD on all teacher settings. This shows that TPKD is relatively robust to the quality of the teachers. Note that Instruct teacher performs poorly on RM using helpsteer2’s test set, but performs as well as DPO teacher on MT-bench, which is a comprehensive evaluation.

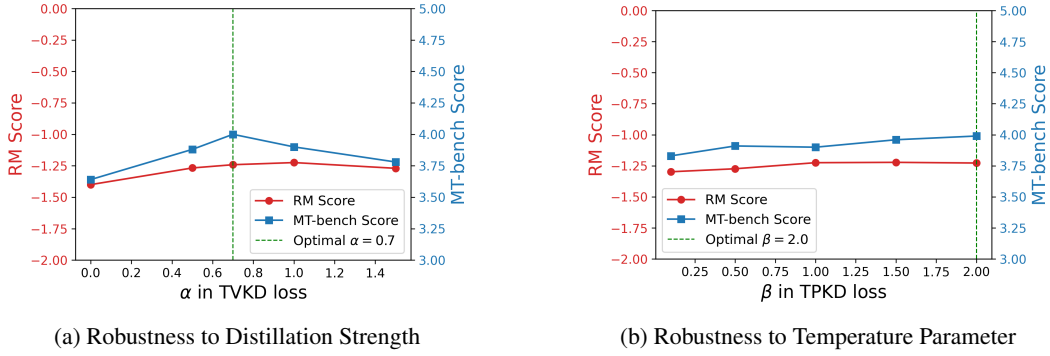

Figure 4: Sensitivity analysis of distillation hyperparameters.

Table 8: RM (higher is better) comparison between DCKD and TPKD across teacher types.

| Teacher Type | DPO   | SFT   | Instruct |
|--------------|-------|-------|----------|
| DCKD         | -1.46 | -1.70 | -1.68    |
| TPKD         | -1.21 | -1.46 | -1.56    |

Table 9: MT-bench (higher is better) comparison between DCKD and TPKD across teacher types.

| Teacher Type | DPO  | SFT  | Instruct |
|--------------|------|------|----------|
| DCKD         | 3.51 | 3.38 | 3.60     |
| TPKD         | 3.98 | 3.73 | 3.96     |
